# Supplementary material for: Predicting Plant Performance Under Simultaneously Changing Environmental Conditions—The Interplay Between Temperature, Light, and Internode Growth
Source: PubMed Central journal article supplement (PMC4685136; doi:10.3389/fpls.2015.01130), 2015-12-21
Supplement: Table1.pdf [file Table1.pdf]

## *Supplementary Material*

# **Predicting plant performance under simultaneously changing environmental conditions – the interplay between temperature, light and internode growth**

**Katrin Kahlen<sup>1\*</sup>, Tsu-Wei Chen<sup>2</sup>**

<sup>1</sup>Department of Vegetable Crops, Geisenheim University, Geisenheim, Germany

<sup>2</sup>Institute of Horticultural Production Systems, Leibniz Universität Hannover, Hannover, Germany

\* **Correspondence:** Katrin Kahlen, Department of Vegetable Crops, Geisenheim University, Von-Lade-Straße 1, 65366 Geisenheim.

Katrin.Kahlen@hs-gm.de

### **1.1. Supplementary Tables**

**Supplementary Table 1.** Time schedule for the two experiments, E1 and E2.

|                  | E1         | E2         |
|------------------|------------|------------|
| Sowing           | 01.06.2012 | 26.03.2014 |
| Transplanting    | 14.06.2012 | 10.04.2014 |
| Start treatments | 21.06.2012 | 14.04.2014 |
